# Supplementary material
Source: publisher figshare collection journal article supplement (https://gsapubs.figshare.com/articles/dataset/_/21005416)
Supplement: Supplementary file 1 [file 1]

## Sheet: S1. Depo Env Criteria
Number	Description	Primary lithology	Primary sedimentary features	Cross-sectional geometry	Channel proximity	Lateral extent	Notes
1	Laterally extensive backswamps	Carbonaceous shale	Laminated	Tabular	Distal	Hundreds of meters to kilometers	Areas were flooded much of the time and had poorly aerated, wet soils in some places. Commonly grade into shallow floodplain lakes.
2	Abandoned channel fills	Fine grained silt or clay	Laminated	Lenticular	Proximal	Metres to tens of meters	Ponds formed as the result of channel abandonment. Centimetre-scale fining upwards sequences common.
3	Crevasse splay channels	Silt finely interlaminated with fine sand	Laminated	Lenticular	Proximal	Meters to tens of meters	Crevasse splays deposited near main channel at higher flow rates.
4	In-channel mud deposition during low flow	Mudstone	Laminated or massive	Lenticular or irregular	Proximal	Meters	Mud drapes/lenses deposited during low flow in channel. Also, mud clasts derived from those drapes and lenses during high flow. Mud underlain and overlain with sand.
5	Shallow floodplain lakes	Mudstone	Laminated or massive	Tabular	Distal	Hundreds of meters to kilometers	Form when floodplain backswamps grade into shallow floodplain lakes, resulting in the deposition of mudstone units with less organic matter.

## Sheet: S2. Sample Information
Sample	CIE phase	Site Name	Area	Latitude	Longitude	Age (Ma)	Depositional environment	TOC (%)	Stdev	n	𝛿13C TOC	Stdev	n	%Clay	%Silt	%Sand
DCF	post	Dorsey Crk Fence	ACEC	44.3413	-108.228	54.291	1	2.70015	0.142096	2	-25.8487	0.0435064	2	15.62	77.59	6.77
LB	post	Lightning Bolt	ACEC	44.2615	-108.132	54.461	2	0.80534	0.031304	3	-26.4774	0.137609	3	40.04	57.51	2.46
SLW9145	post	160m CS	ACEC	44.293994°	-108.086671°	55.072	1	1.23248	0.077175	2	-26.1223	0.0283624	2	48.17	50.68	1.14
SLW9143	post	160m CS	ACEC	44.301167°	-108.095333°	55.072	1	1.03963	0.0560225	2	-26.4597	0.164626	2	45.79	53.45	0.78
SLW9911	post	Wa3b	PCB-SC	44.805188°	-109.108137°	55.256	2	0.968716	0.0763186	5	-19.8959	1.63186	5	31.99	66.96	1.05
SLW8830	post	WCS7	ACEC	44.2798	-108.052	55.266	1	0.612761	0.00674404	2	-26.1151	0.122366	2	38.39	59.53	2.07
SLW0907	recovery	Ants Steal Cuticle	BRS	43.9322	-107.593	55.801	2	0.61463	0.0631092	2	-26.5095	0.0024975	2	29.33	52.1	18.54
SLW0306	recovery	Big Red Sequence II	CAB10	43.9575	-107.651	55.804	3	1.20883	0.0443362	2	-26.1597	0.0261288	2	34.09	48.57	17.36
SLW1011	recovery	Up the Gully	SCD	44.143	-107.86	55.805	3	0.610669	0.129621	2	-26.9923	0.0135595	2	16.27	47.01	36.75
SLW1001	recovery	Ground Possum	SCD	13T 0270400	4891328	55.805	1	1.81406	0.110468	2	-28.9952	0.0594077	2	37.09	60.83	2.09
SLW0603	recovery	Big Red Sequence 1.5m	BRS	43.9322	-107.608	55.808	3	0.740267	0.178802	2	-26.3996	0.014737	2	29.17	51.87	18.94
SLW0602	recovery	Big Red Sequence 4m	BRS	43.9311	-107.607	55.808	3	1.46473	0.54699	2	-26.2911	0.204302	2	27.13	51.66	21.18
RSB1511	recovery		BRS	43.9234	-107.598	55.808	2	1.15273	0.165667	2	-29.4016	0.135233	2	23.18	62.17	14.68
SLW0307	recovery	First PETM	CAB10	43.958	-107.652	55.814	3	0.572205	0.013557	3	-28.4748	0.0131832	3	19.41	72.09	8.49
SLW0812	recovery	Sarah's Perfect	Hwy16	13T 0282298	4876253	55.818	1	3.12173	0.280531	2	-29.2415	0.0712687	2	67.83	32.17	0
SLW0606	body	Fabiany’s Site	BRS	43.9204	-107.596	55.83	2	1.06014	0.0824119	2	-29.7089	0.0830193	2	34.53	62.69	2.8
SLW1006	body	Ross's Site	HWY16	13T 0281354	4877479	55.833	2	2.90364	0.546561	2	-30.052	0.0109894	2	29.09	59.31	11.57
PS1607	body	Allons Enfant	PCB-SC	44.7732	-108.986	55.839	2	0.252794	0.0122572	3	-27.8357	0.118166	3	38.14	61	0.88
PS1606	body	Allons Enfant	PCB-SC	44.7732	-108.986	55.839	2	0.376743	0.00684321	4	-26.5977	1.07078	4	24.08	71.75	4.17
SLW0601	body	Hubble Bubble	BRS	43.945	-107.619	55.866	2	0.487378	0.0166136	2	-25.9574	0.0115751	2	48.73	51.28	0
SLW1010-Q	body	Steep Face	SCD	43.9482	-107.655	55.87	2	0.291119	0.0334701	2	-27.9452	0.278794	2	34.65	62.54	2.81
SLW1010-L	body	Steep Face	SCD	43.9482	-107.655	55.87	2	0.486234	0.0254515	3	-28.1493	0.246133	3	38.33	61.29	0.38
SLW2003	body	New PETM 2020	LGC	43.9402	-108.167	55.9	4	0.260078	0.00319232	2	-26.6587	0.20902	2	40.41	54.39	5.21
PS2005	body	New PETM 2020	LGC	43.9402	-108.167	55.9	4	0.387131	0.0116247	2	-26.6027	0.134272	2	49.32	50.6	0.07
SLW1702	body	Mud lumps	PCB-SC	44.787	-109.011	55.9	4	0.324569	0.0402354	2	-28.3569	0.110665	2	11.12	28.5	60.37
PS2022	body	Brown bed mud lumps	PCB-SC	44.7803	-108.991	55.91	4	0.527397	0.0286911	2	-28.3897	0.0822584	2	28.45	67.09	4.46
SLW0410-GG	body	Low PETM lat	CAB10	43.9482	-107.655	55.912	2	0.812585	0.0166892	3	-29.7782	0.0599659	3	46.7	39.6	13.7
PS0504	body	Jon's Site	BRS	43.9345	-107.617	55.921	2	1.36478	0.0885652	2	-30.0595	0.0684885	2	35.12	61.16	3.72
PS2032	pre	Mud lumps	PCB-SC	44.7879	-109.011	55.94	4	0.633297	0.0163655	2	-25.464	0.0236437	2	9.94	65.12	24.98
PS2023	pre	Mud lumps	PCB-SC	44.7799	-108.993	55.94	4	0.375934	0.0133302	2	-29.0697	0.0620879	2	28.12	69.78	2.1
SLW0714	pre	Big Quarry	HWY16	44.0277	-107.734	55.952	3	0.755537	0.0826146	2	-26.3782	0.0252957	2	32.98	57.73	9.25
SLW1704	pre	Mud lumps	PCB-SC	44.7808	-108.999	55.96	4	0.496602	0.0186752	2	-28.481	0.170642	2	28.73	59.13	12.14
PS2020	pre	~8.5m below CIE	SCD	44.1571	-107.873	55.976	1	0.613275	0.047925	2	-26.5374	0.154895	2	73.42	26.58	0
SLW1612	pre	Singindenhammer	PCB-SC	44.7825	-108.981	56.023	2	0.824029	0.0542022	2	-23.8524	0.10601	2	38.29	61.71	0
SLW9819	pre	Daiye Spa	PCB-SC	44.8384	-109.073	56.08	2	0.553516	0.00497293	2	-25.1955	0.26469	2	44.09	54.88	1.04
SLW9432	pre		SCD	44.159377°	-107.849089°	56.176	5	1.13809	0.0750732	2	-25.6646	0.0842325	2	48.57	51.43	0
SLW9417	pre	Leo's pond	NBS	43.946261°	-107.569856°	56.576	2	1.31033	0.0251854	2	-26.3044	0.013478	2	48.64	51.01	0.34
SLW9901	pre	Dead Platypus	PCB-SC	44.8719	-109.074	56.698	2	1.21609	0.0247046	2	-25.2471	0.0776998	2	42.48	56.64	0.88
LJH7871	pre	SW thesis site	PCB-SC	44.907049°	-109.030963°	57.387	1	0.819649	0.0132103	2	-25.7008	0.0778988	2	51.55	48.43	0
PW0203	pre	Skeleton Coast	PCB-SC	44.8487	-108.756	59.313	1	0.594848	0.0195286	2	-25.2509	0.133113	2	53.07	46.95	0

## Sheet: S3. Stratigraphic Ranges
Paleocene or younger pollen	References
Caryapollenites inelegans	Nichols and Ott 1978	Pocknall and Nichols 1996	Harrington 1999
Caryapollenites veripites	Leffingwell 1971	Nichols and Ott 1978	Harrington 1999
Caryapollenites wodehousei	Nichols and Ott 1978	Pocknall and Nichols 1996	Harrington 1999
Eucommia? leopoldae	Frederiksen 1983	Pocknall and Nichols 1996	Harrington and Kemp 2001	Zetter et al. 2011
Jarzenipollenites trinus	Frederiksen 1979	Frederiksen 1980	Pocknall and Nichols 1996	Harrington 1999
Momipites leboensis	Leffingwell 1970	Pocknall and Nichols 1996
Momipites leffingwellii	Leffingwell 1971	Nichols and Ott 1978	Nichols and Brown 1992
Paraalnipollenites confusus	Wingate 1983	Gapanoff 1984	Pocknall and Nichols 1996	Harrington 1999
Triporopollenites granilabratus	Stanley 1965	Srivastava 1972	Nichols and Brown 1992	Harrington 1999
Triporopollenites infrequens	Frederiksen 1979	Nichols and Brown 1992	Harrington 1999
Ulmipollenites krempii	Srivastava 1979	Frederiksen 1980	Nichols and Brown 1992	Pocknall and Nichols 1996	Harrington and Kemp 2001
Ulmipollenites tricostatus	Frederiksen 1980	Wingate 1983	Pocknall and Nichols 1996	Harrington and Kemp 2001	Zetter et al. 2011
Mesozoic spores and pollen	References
Aequitriradites ornatus	Upshaw 1963	Nichols and Warner 1978
Anemia striosporites	Rouse et al. 1962	Rouse et al. 1970
Aquilapollenites quadrilobus	Nichols and Ott 1978	Nichols et al. 1992	Bercovici et al. 2009
Classopollis classoides	Cornet and Traverse 1975	Nichols and Warner 1978	Oboh-Ikuenobe et al. 2007
Mesozoic dinoflagellates	References
Oligosphaeridium spp.	Oboh-Ikuenobe et al. 2007
Chichaouadinium vestitum	Oboh-Ikuenobe et al. 2007
Impletosphaeridium spp.	Palamarczuk and Landman 2011
Dinogymnium spp.	Nichols and Jacobson 1982
Surculosphaeridium spp.	Nichols and Jacobson 1982
Epelidosphaeridia spinosa	Oboh-Ikuenobe et al. 2007

## Sheet: S4. 𝛿13Cpollen
Sample	CIE phase	Age (Ma)	Pollen	𝛿13C pollen	nmol C	Expected error in instrument accuracy	Expected error in instrument precision
SLW9417	pre	56.576	Caryapollenites veripites	-26.4587	1.9	0.709367	0.771193
SLW9417	pre	56.576	Caryapollenites veripites	-25.8329	1.77	0.738768	0.802019
SLW0601	body	55.866	Caryapollenites veripites	-26.6013	1.32	0.873993	0.943271
SLW1612	pre	56.023	Arecipites tenuiexinous	-27.0548	0.29	2.08278	2.18076
SLW1612	pre	56.023	Arecipites tenuiexinous	-26.7157	0.17	2.82846	2.93005
SLW1612	pre	56.023	Arecipites tenuiexinous	-26.7445	0.17	2.82846	2.93005
PS0504	body	55.921	Arecipites tenuiexinous	-30.9785	0.48	1.56043	1.65039
PS0504	body	55.921	Arecipites tenuiexinous	-30.5744	0.45	1.61922	1.71036
PS0504	body	55.921	Arecipites tenuiexinous	-31.7028	0.25	2.26766	2.3673
PS0504	body	55.921	Arecipites tenuiexinous	-30.1136	0.23	2.37863	2.47901
SLW9901	pre	56.698	Cupressacites hiatipites	-23.37	0.34	1.90134	1.99713
SLW9901	pre	56.698	Cupressacites hiatipites	-21.9903	0.27	2.16983	2.26866
PS1606	body	55.839	Cupressacites hiatipites	-23.518	0.19	2.65382	2.75526

## Sheet: S5. Reworking & Concentration
Sample	CIE phase	Spore-pollen sum	# reworked grains	# autochthonous grains	% reworking	Lycopodium spike count	Sediment volume (cm3)	Lyopodium tablet	Pollen concentration	# dinoflagellates	Dinoflagellate concentration
DCF	post	200	2	198	1	333	1	177745	106754	0	0
LB	post	200	3	197	1.5	63	2	12542	19907.9	0	0
SLW9145	post	200	2	198	1	50	2	12542	25084	1	68.163
SLW9143	post	200	5	195	2.5	92	2	12542	13632.6	0	0
SLW9911	post	200	24	176	12	259	1	177745	137255	4	2745.1
SLW8830	post	200	2	198	1	118	2	12542	10628.8	0	0
SLW0907	recovery	200	19	181	9.5	197	1	177745	180452	2	1804.52
SLW0306	recovery	200	2	198	1	12	2	12542	104517	1	522.583
SLW1011	recovery	200	3	197	1.5	53	2.5	12542	18931.3	0	0
SLW1001	recovery	200	2	198	1	38	2.5	12542	26404.2	3	283.97
SLW0603	recovery	200	1	199	0.5	23	2	12542	54530.4	0	0
SLW0602	recovery	200	1	199	0.5	38	2.5	12542	26404.2	0	0
RSB1511	recovery	200	1	199	0.5	155	1	177745	229348	0	0
SLW0307	recovery	200	11	189	5.5	158	1	177745	224994	0	0
SLW0812	recovery	200	2	198	1	43	2.5	12542	23334	0	0
SLW0606	body	200	8	192	4	75	2.5	12542	13378.1	1	66.8907
SLW1006	body	200	9	191	4.5	138	1	177745	257601	3	3864.02
PS1607 & PS1606	body	200	113	87	56.5	656	2	355490	54190.5	30	8128.58
SLW0601	body	200	102	98	51	278	1	177745	127874	14	8951.19
SLW1010-Q/L	body	200	86	114	43	634	2	355490	56071	31	8691
SLW2003 & PS2005	body	200	90	110	45	221	2	12542	5675.11	80	2270.05
SLW1702	body	200	99	101	49.5	1224	1	177745	29043.3	59	8567.77
PS2022	body	200	93	107	46.5	190	2	12542	6601.05	21	693.111
SLW0410-GG	body	200	8	192	4	479	2	12542	2618.37	1	13.0919
PS0504	body	200	2	198	1	128	1	177745	277727	1	1388.63
PS2032	pre	100	46	54	46	193	2	12542	3249.22	11	357.415
PS2023	pre	100	35	65	35	6	2	12542	104517	23	24038.8
SLW0714	pre	200	36	164	18	348	1	177745	102152	22	11236.8
SLW1704	pre	200	39	161	19.5	401	1	177745	88650.9	14	6205.56
PS2020	pre	200	0	200	0	37	2	12542	33897.3	0	0
SLW1612	pre	200	33	167	16.5	249	1	177745	142767	12	8566.02
SLW9819	pre	200	49	151	24.5	199	1	177745	178638	39	34834.4
SLW9432	pre	200	1	199	0.5	12	2	177745	1.48121e+06	0	0
SLW9417	pre	200	6	194	3	57	2	177745	311833	1	1559.17
SLW9901	pre	200	3	197	1.5	294	2	177745	60457.5	3	906.862
LJH7871	pre	200	4	196	2	184	2	177745	96600.5	1	483.003
PW0203	pre	200	4	196	2	366	2	177745	48564.2	2	485.642

## Sheet: S6. 𝛿13Cn-alkane
			δ13Cn-alkane (‰)
			C25	C25	C27	C27	C29	C29	C31	C31	C33	C33		Reference
Sample Name	Age	CIE phase	Avg1	Uncert2	Avg1	Uncert2	Avg1	Uncert2	Avg1	Uncert2	Avg1	Uncert2
SLW9417	56.576	pre	-29.7918	0.239496	-30.7603	0.239349	-30.9003	0.239328	-31.0232	0.239309				This study
SLW9901	56.698	pre	-29.4664	0.239546	-29.8652	0.239485	-29.9662	0.23947	-31.0412	0.23947				This study
PP0904	56.1147	pre	-28.97	0.16	-29.99	0.16	-30.93	0.16	-31.92	0.16				Baczynski et al. 2016
SLW1612	56.023	pre					-30.9762	0.239316	-30.9812	0.239316				This study
CAB3-04-063	56	pre	-29.1	0.4	-29.5	0	-30.9	0.1	-31.6	0				Baczynski et al. 2016
CAB3-04-073	55.984	pre	-29.7	0.1	-30.3	0.1	-31.1	0.1	-31.4	0				Baczynski et al. 2016
FAS0802	55.981	pre	-29.35	0.16	-30.28	0.16	-31.03	0.16	-31.75	0.16				Baczynski et al. 2016
SCD C	55.9762	pre	-30.04	0.18	-30.6	0.18	-30.66	0.18	-31.37	0.23				Baczynski et al. 2016
FAS0801	55.952	pre	-30.38	0.09	-30.86	0.09	-31.63	0.09	-32.62	0.09				Baczynski et al. 2016
FAS0803	55.952	pre	-29.32	0.16	-30.06	0.16	-30.69	0.16	-31.11	0.16				Baczynski et al. 2016
SW0801	55.9525	pre	-30.43	0.16	-30.72	0.16	-31.33	0.16	-32.56	0.16				Baczynski et al. 2016
SW0803	55.9525	pre	-29.04	0.11	-29.72	0.11	-30.13	0.11	-30.8	0.11				Baczynski et al. 2016
SW0904	55.9525	pre	-29.1	0.16	-30.19	0.23	-30.68	0.23	-29.99	0.23				Baczynski et al. 2016
Wing 0902A	55.952	pre	-29.45	0.16	-30.32	0.16	-30.93	0.16	-31.73	0.16				Baczynski et al. 2016
PS 0901	55.933	pre	-28.79	0.23	-29.8	0.23	-29.88	0.23	-30.26	0.23				Baczynski et al. 2016
NUHS0819-14	55.927	body	-31.36	0.16	-33.24	0.16	-34.39	0.16	-36.09	0.16				Baczynski et al. 2016
PS0505	55.921	body	-33.9574	0.238863	-34.4572	0.238787	-35.0964	0.23869	-36.9705	0.238406	-37.4953	0.238326		This study
CAB7-04-023	55.912	body	-33.7	0.2	-34	0	-35.5	0	-36.5	0	-37.4	0.1		Baczynski et al. 2016
CAB7-04-033	55.912	body	-33.5	0.5	-33	0.1	-34.1	0.1	-35.8	0	-36	0		Baczynski et al. 2016
CAB1-04-063	55.906	body			-34.8	0.3	-35.3	0.1	-36.3	0	-36.9	0.2		Baczynski et al. 2016
NUHS0817-2	55.902	body	-30.25	0.16	-32.32	0.16	-33.71	0.16						Baczynski et al. 2016
SW10034	55.8782	body	-34.77	0.078	-35.97	0.071	-36.35	0.049	-37.17	0.134	-37.35	0.375		Baczynski et al. 2016
SW10094	55.8745	body			-34.35	0.21	-34.44	0.08	-35.59	0.08				Baczynski et al. 2016
SW10104	55.87	body	-32.65	0.057	-33.48	0.17	-34.35	0.205	-33.81	0.622				Baczynski et al. 2016
SLW0601	55.866	body	-33.9069	0.238871	-34.7235	0.238747	-35.2928	0.23866	-36.5002	0.238477	-37.4263	0.238337		This study
SW0805	55.8556	body	-33.77	0.16	-34.59	0.16	-35.82	0.16	-36.58	0.13	-37.29	0.16		Baczynski et al. 2016
SW0906	55.8556	body	-33.31	0.16	-34.67	0.16	-35.75	0.16	-36.69	0.16	-37.88	0.16		Baczynski et al. 2016
SW10074	55.8556	body	-33.15	0.259	-33.78	0.164	-34.22	0.195	-35.84	0.296	-36.5	0.148		Baczynski et al. 2016
SW1515	55.839	body	-31.1	0.3	-33.2	0.3	-33.7	0.3						This study
PP0811	55.833	body	-32.56	0.16	-33.8	0.16	-34.97	0.16	-35.67	0.16				Baczynski et al. 2016
SW0802	55.8329	body	-33.37	0.1	-33.45	0.1	-34.49	0.1	-35.05	0.1				Baczynski et al. 2016
SW10064	55.833	body	-32.75	0.11	-33.31	0.29	-33.85	0.12	-35	0.03	-35.93	0.25		Baczynski et al. 2016
SW0813	55.818	recovery	-33.42	0.11	-34.12	0.11	-34.18	0.11	-34.01	0.11				Baczynski et al. 2016
CAB6-04-01.13	55.814	recovery			-33	0.2	-33.2	0.3	-34.5	0.2	-35.7			Baczynski et al. 2016
SW10014	55.805	recovery	-29.83	0.283	-31.34	0.53	-31.67	0.304	-31.09	0.113				Baczynski et al. 2016
SW10114	55.805	recovery	-29.47	0.113	-30.33	0.106	-30.89	0.453						Baczynski et al. 2016
SW03063	55.804	recovery	-29.3	0.8	-30	0.3	-30.6	0.1	-32	0.3	-31.3	0		Baczynski et al. 2016
SW0907	55.801	recovery	-29.95	0.2	-30.69	0.2	-31.42	0.2	-32.24	0.2				Baczynski et al. 2016
SW0809	55.7694	post	-29.92	0.16	-30.24	0.16	-31.18	0.16	-31.87	0.16				Baczynski et al. 2016
SW0817	55.7694	post	-31.97	0.16	-32.46	0.16	-33.05	0.16	-32.5	0.16				Baczynski et al. 2016
CAB6-04-043	55.719	post	-29.6	0.3	-29.9	0	-30.8	0	-31.8	0.2	-31.6			Baczynski et al. 2016
SW0905	55.6265	post	-28.99	0.1	-29.83	0.1	-30.09	0.1	-31.33	0.1				Baczynski et al. 2016
1δ13C values on the VPDB scale (‰), calculated using the Uncertainty Calculator spreadsheet (Polissar and D’Andrea, 2014), except for those in italics (see footnotes 3 and 4)
2Uncertainty of δ13C values reported as standard error of the mean (SEM), calculated using the Uncertainty Calculator spreadsheet (Polissar and D'Andrea, 2014), except for those in italics (see footnotes 3 and 4).
3δ13C values and uncertainty (reported as standard deviation) from Smith et al., 2007
4δ13C values corrected using internal standards and uncertainty reported as standard deviation

## Sheet: S7. 𝛿13Cpollen standards
Both standards
nmol C	error in accuracy	error in precision
5	0.260062	0.554673
2.5	0.992687	0.518129
1.25	0.935739	1.06754
0.625	1.51209	1.19137
0.3125	1.8393	2.17396
0.15625	2.63462	3.35348

## Sheet: S8. Preservation state
Species	Sample	PETM phase	Broken	Corroded	Degraded	Darker	Pristine	Total # grains	# deteriorated grains
Arecipites tenuiexinous	SLW0812	recovery	1	0	0	0	14	15	0
Arecipites tenuiexinous	PS0504	body	2	0	0	0	15	17	0
Arecipites tenuiexinous	SLW1612	pre	0	0	0	1	5	6	0
Caryapollenites veripites	SLW0306	recovery	0	1	0	0	3	4	0
Caryapollenites veripites	SLW0601	body	2	10	10	10	1	11	10
Caryapollenites veripites	SLW9417	pre	3	3	1	0	11	18	1
Cupressacites hiatipites	DCF	post	0	1	0	0	6	7	0
Cupressacites hiatipites	SLW1001	recovery	1	0	0	4	11	16	1
Cupressacites hiatipites	PS1606	body	2	7	4	7	1	9	7
Cupressacites hiatipites	SLW9901	pre	0	1	0	0	13	14	0

## Sheet: G50441
Korasidis, V.A., et al., 2022, Reworked pollen reduces apparent floral change during the Paleocene-Eocene Thermal Maximum: Geology, v. 50, https://doi.org/10.1130/G50441.1
